# Supplementary material for: Delta Opioid Peptide Targets Brain Microvascular Endothelial Cells Reducing Apoptosis to Relieve Hypoxia-Ischemic/Reperfusion Injury
Source: MDPI journal article supplement (doi:10.3390/pharmaceutics15010046), 2022-12-23
Supplement: s1 [file s1]

# Supplementary Materials: Delta Opioid Peptide Targets Brain Microvascular Endothelial Cells Reducing Apoptosis to Relieve Hypoxia-Ischemic/Reperfusion Injury

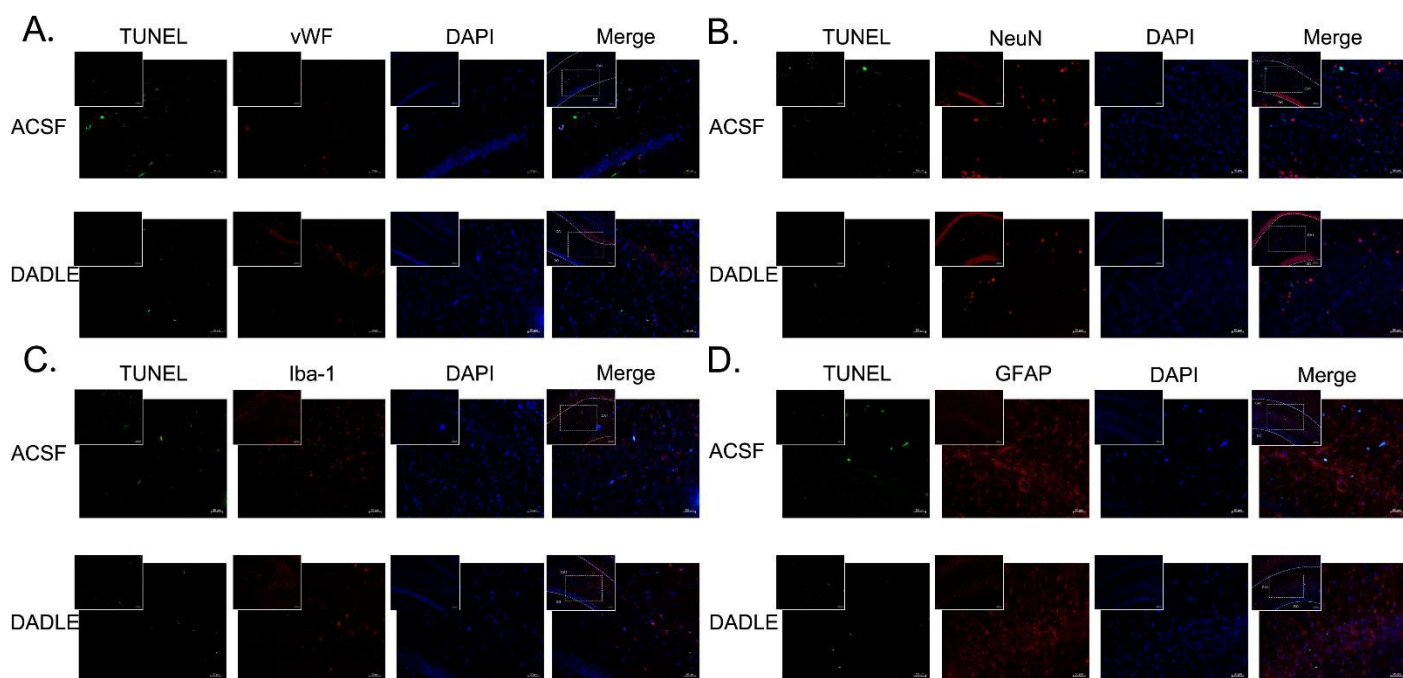

**Figure S1.** MCAO/R-induced cellular apoptosis in the CA1 area of the hippocampus mainly co-localized with vascular endothelial cells, but not neuron, microglia nor astroglia, and DADLE (5 nmol/10  $\mu$ L) pretreatment decreased endothelial apoptosis at 72 h after surgery. (A-D) TUNEL-positive cells were stained green. DAPI represented nuclei and showed as blue. Red fluorescence signals respectively represented vWF indicating vascular endothelial cells (A), NeuN indicating neuron (B), Iba-1 indicating microglia (C) and GFAP indicating astroglia (D).  $n=3$  in all the groups.

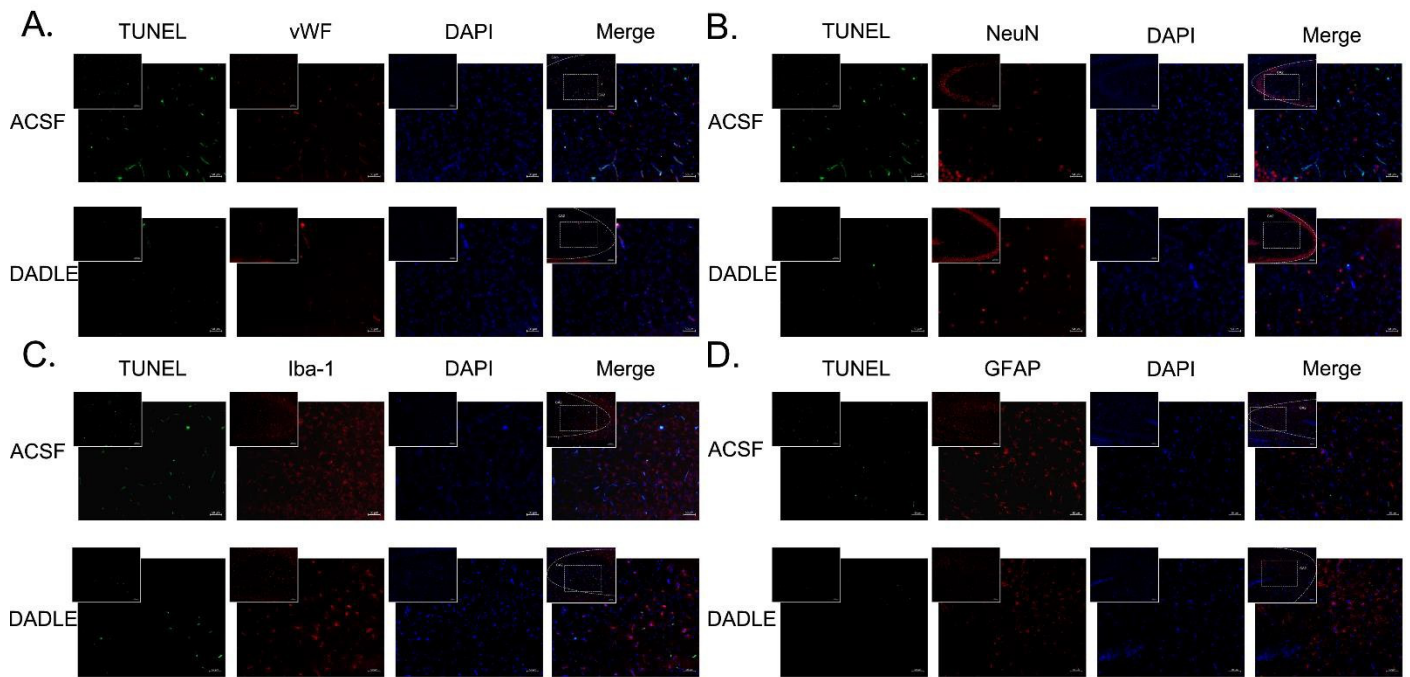

**Figure S2.** MCAO/R-induced cellular apoptosis in the CA2 area of the hippocampus mainly co-localized with vascular endothelial cells, but not neuron, microglia nor astroglia, and DADLE (5 nmol/10  $\mu$ L) pretreatment decreased endothelial apoptosis at 72 h after surgery. (A-D) TUNEL-positive cells were stained green. DAPI represented nuclei and showed as blue. Red fluorescence signals respectively represented vWF indicating vascular endothelial cells (A), NeuN indicating neuron (B), Iba-1 indicating microglia (C) and GFAP indicating astroglia (D).  $n=3$  in all the groups.

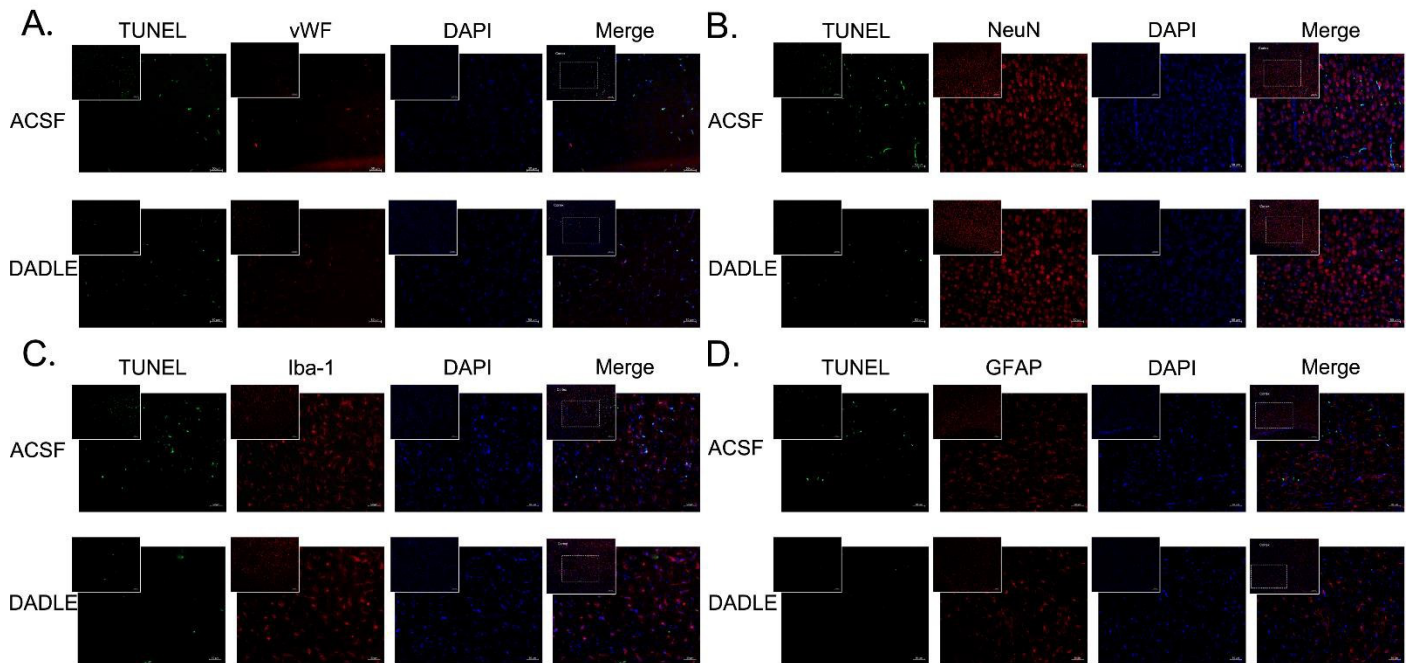

**Figure S3.** MCAO/R-induced cellular apoptosis in the cortex mainly co-localized with vascular endothelial cells, but not neuron, microglia nor astroglia, and DADLE (5 nmol/10  $\mu$ L) pretreatment decreased endothelial apoptosis at 72 h after surgery. (A-D) TUNEL-positive cells were stained green. DAPI represented nuclei and showed as blue. Red fluorescence signals respectively represented vWF indicating vascular endothelial cells (A), NeuN indicating neuron (B), Iba-1 indicating microglia (C) and GFAP indicating astroglia (D).  $n=3$  in all the groups.

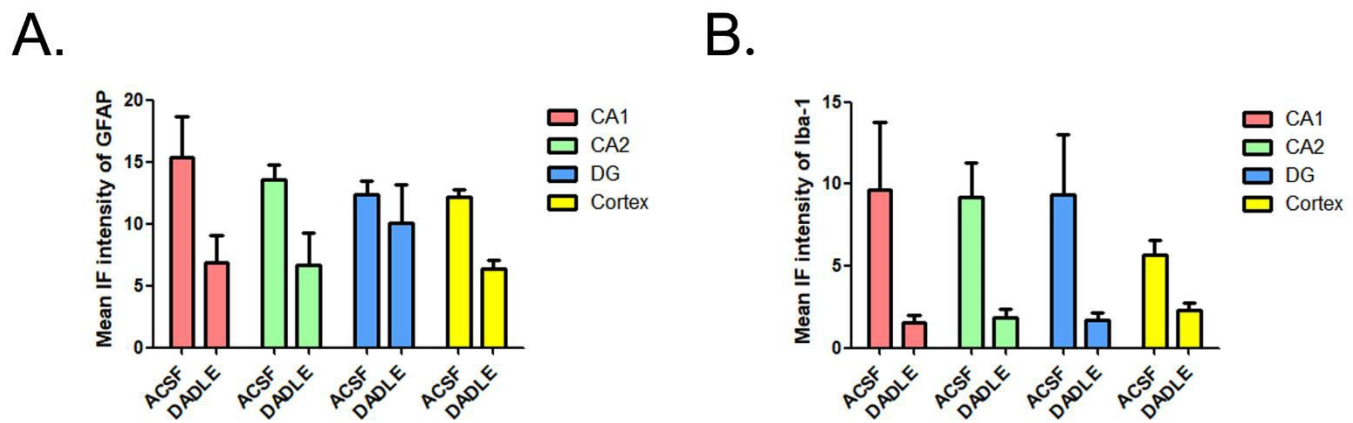

**Figure S4.** Statistical analysis of the fluorescence intensity changes of GFAP-(A) and Iba-1-(B) positive signals between the ACSF- and DADLE-administered MCAO/R groups within the CA1, CA2 and DG of the hippocampus or cortex area. Bars represent the mean  $\pm$  S.E.M. Every group contained data from three rats.

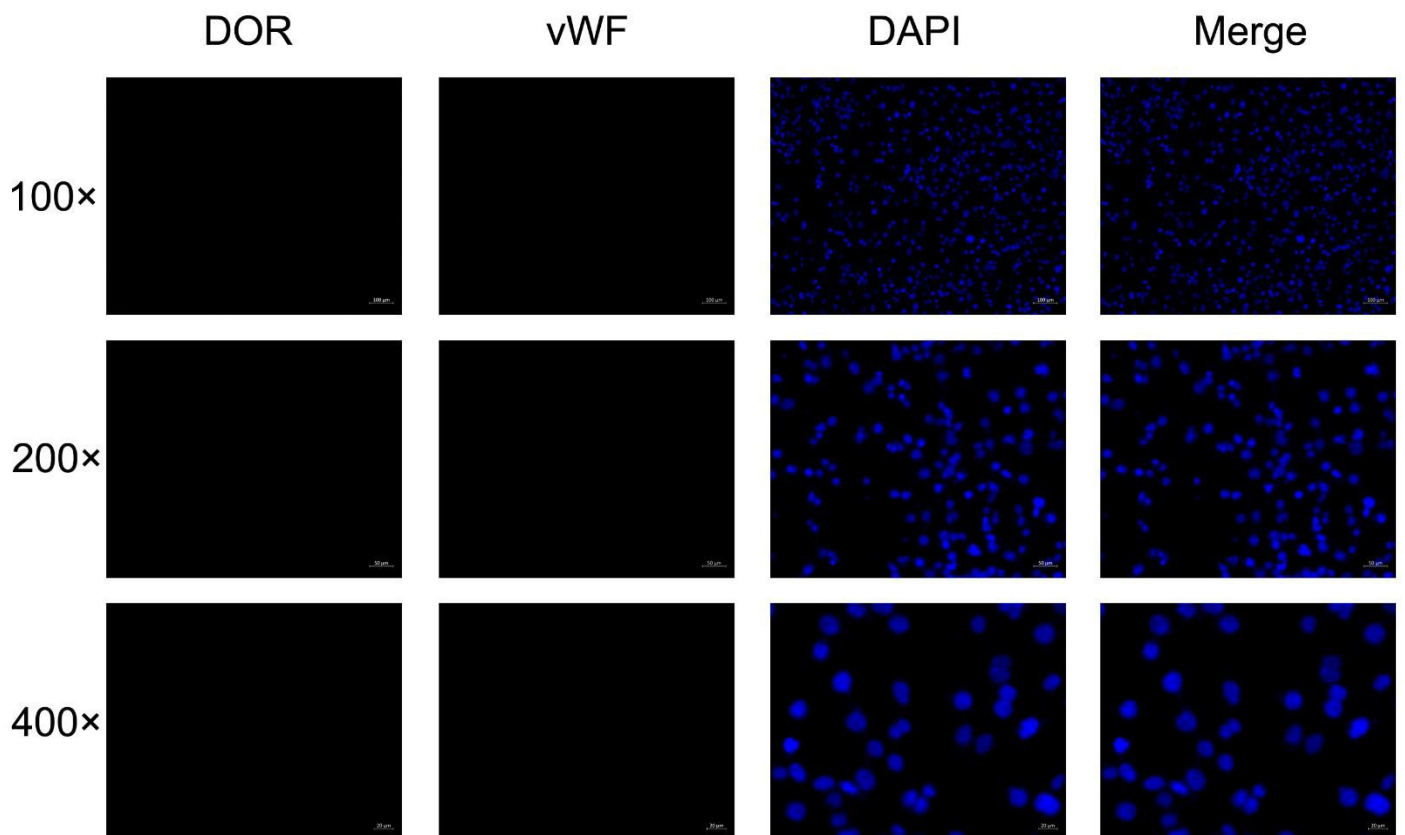

**Figure S5.** The HEK293 cells do not express  $\delta$ ORs nor vWF. (A) Typical immunofluorescence pictures showed the expression of  $\delta$ ORs (Green) and vWF (Red) on the BMECs. DAPI represented the nuclei and showed as blue. Individual experiments were repeated three times.
